# Supplementary material for: Excitation-dependent carbon dots powders based on dehydration condensation by microwave–hydrothermal method
Source: Springer Nature journal article supplement (doi:10.1007/s10853-018-2764-8), 2018-08-10
Supplement: MOESM1 [file 16027738]

**Supplementary information**





**Supporting information 1 XRD patterns of CDs**

The XRD pattern of as-prepared CDs is measured and shown in the supporting information 1. Compared with the JCPDS card 26-1080, the main diffraction peaks at 26.6 and 42.5 O can well match the card. The CDs belongs to Hexagonal crystal system and P63mc space group. Broaden of the diffraction peak are attributed to the small size of CDs. The strongest diffraction peak at 28.9o belongs to the SiO2 in the glass.

**Supporting information 2 the CIE coordinate of CDs sample excited at different wavelength.**

| Excitation wavelength（nm） | CIE coordinate |
| --- | --- |
| 360 nm | （0.17,0.23） |
| 380 nm | （0.19,0.27） |
| 400 nm | （0.24,0.27） |
| 420 nm | （0.29,0.47） |
| 440 nm | （0.34,0.54） |
| 460 nm | (0.39,0.56) |
| 480 nm | (0.44,0.54) |


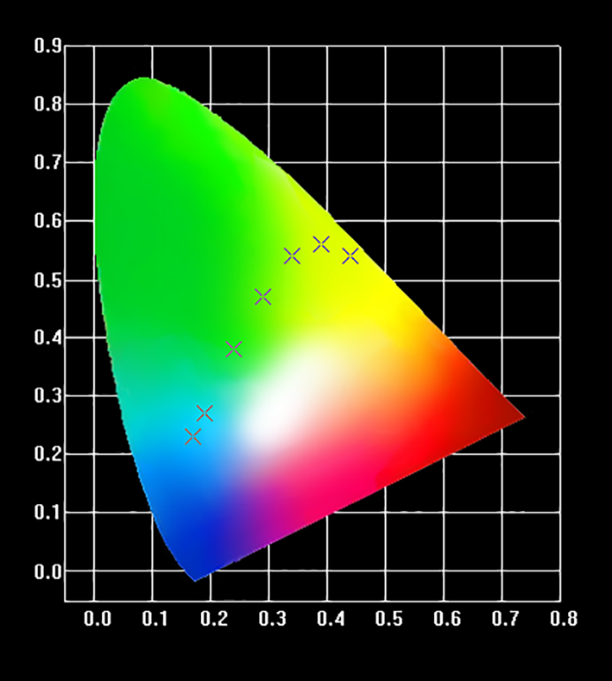


**Supporting information 3 the CIE coordinate of CDs sample excited at different wavelength.**

**Supporting information 4 the luminescent intensity and FWHM of CDs sample excited at different wavelength.**

| Excitation wavelength （nm） | Emission peak（nm） | Intensity（a.u.） | FWHM（nm） |
| --- | --- | --- | --- |
| 360 | 456 | 3034 | 133 |
| 380 | 467 | 2856 | 136 |
| 400 | 501 | 2845 | 131 |
| 420 | 520 | 3160 | 118 |
| 440 | 531 | 2967 | 113 |
| 460 | 544 | 2253 | 113 |
| 480 | 557 | 1327 | 114 |

**Supporting information 5 the fitting parameters of decay curve of CDs excited by 369 and 456 nm light.**

| Excitation wavelength （nm） | A1 | τ1(ns) | A2 | τ2(ns) | Τ(ns) |
| --- | --- | --- | --- | --- | --- |
| 369 | 1649.42 | 8.182 | 1466.49 | 2.168 | 7.04 |
| 456 | 1754.33 | 7.529 | 1374.43 | 2.092 | 6.56 |
